# Supplementary material for: Promoting formic acid oxidation performance of Pd nanoparticles via Pt and Ru atom mediated surface engineering
Source: Royal Society of Chemistry journal article supplement (doi:10.1039/d0ra01303j), 2020-01-01
Supplement: d0ra01303j1.pdf [file d0ra01303j1.pdf]

## Promoting Formic Acid Oxidation Performance of Pd Nanoparticles Via Pt and Ru Atoms Mediated Surface Engineering

Authors: Dinesh Bhalothia,<sup>a</sup> Tzu-Hsi Huang,<sup>b</sup> Pai-Hung Chou,<sup>b</sup> Kuan-Wen Wang,<sup>b\*</sup> and Tsan-Yao Chen<sup>a,c\*</sup>

Affiliations:

<sup>a</sup>. Department of Engineering and System Science, National Tsing Hua University, Hsinchu 30013, Taiwan.

<sup>b</sup>. Institute of Materials Science and Engineering, National Central University, Taoyuan City 32001, Taiwan.

<sup>c</sup>. Hierarchical Green-Energy Materials (Hi-GEM) Research Centre, National Cheng Kung University, Tainan 70101, Taiwan

Corresponding Authors:

Tsan-Yao Chen

Email: [chencaeser@gmail.com](mailto:chencaeser@gmail.com)

Tel: +886-3-5715131 # 34271

FAX: +885-3-5720724

Kuan-Wen Wang

Email: [kuanwen.wang@gmail.com](mailto:kuanwen.wang@gmail.com)

Tel: +886-3-4227151 # 34906

1. **Electrochemical analysis results after CA analysis in formic acid oxidation reaction.**

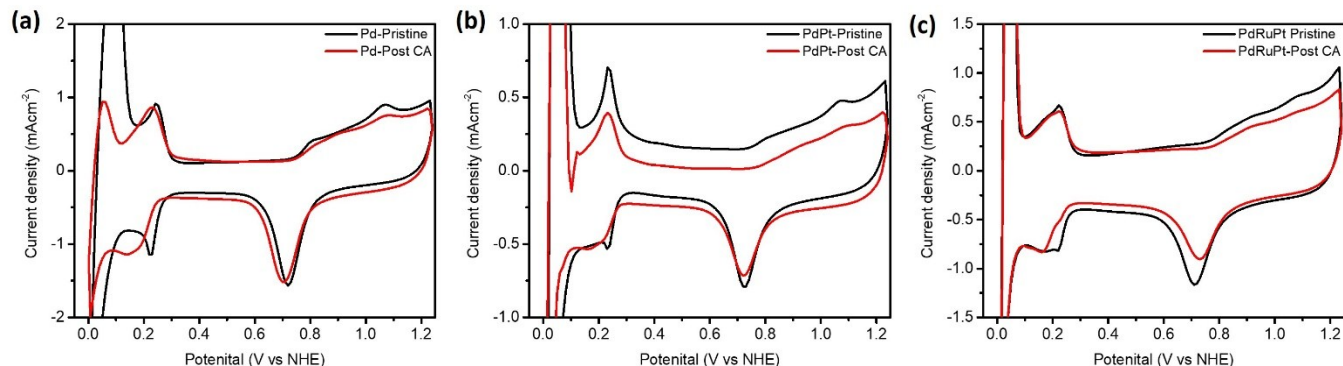

**Figure S1.** The CV sweeping curves of experimental samples after CA analysis for (a) Pd, (b) PdPt, and (c) PdRuPt recorded in 0.5 M H<sub>2</sub>SO<sub>4</sub> saturated with N<sub>2</sub>.

2. **Mass activity on experimental NCs at 0.3 V and 0.5 V in forward scan.**

The mass activities (MA) at 0.3 V and 0.5 V vs NHE in forward scan have been calculated by obtaining the FAOR current densities from LSV curves (**Figure 5b**) at corresponding potentials. The mass activity obtained when FAOR current density was normalized to the Pt + Pd loading.

For each catalyst, the current density:

$$\text{Current density} \left( \frac{\text{mA}}{\text{cm}^2} \right) = \frac{\text{mA}}{0.19625}$$

Where 0.19625 cm<sup>2</sup> is the geometric surface area of the electrode.

**Table S1.** Mass activity on experimental NCs at 0.3 V and 0.5 V in forward scan.

| Samples | MA <sub>f</sub> -0.3 V<br>(Pt&Pd)<br>(A/mg) | MA <sub>f</sub> -0.5 V<br>(Pt&Pd)<br>(A/mg) |
|---------|---------------------------------------------|---------------------------------------------|
| Pd      | 0.47                                        | 0.48                                        |
| PdPt    | 0.96                                        | 0.40                                        |
| PdRuPt  | 0.95                                        | 0.58                                        |

### 3. **Benchmark of Pd-based NCs in formic acid oxidation reaction.**

The recent advancements in the design of Pd-based nanocatalysts towards formic acid oxidation reaction are summarized in **Table S2**. Accordingly, most bi- and multi-metallic Pd or PdPt NCs reported in previous studies demonstrate mass activities around 0.1-0.6 A/mg. Besides, the PdPt bimetallic NC in the present study possess an optimum mass activity of 1.0 A/mg with ultra-low content of Pt. In addition, we also demonstrate that incorporation of Ru-atoms enhances the CO-tolerance of PdPt NC during CA stability test.

In the following comparison table MA-0.3 V and MA-0.5 V are corresponding to current densities at 0.3 V and 0.5 V, respectively. Whereas MA-maximum is corresponding to the maximum current density in forward scan.

**Table S2.** Comparison of the formic acid oxidation reaction performance of Pd-based NCs.

| Catalysts                                                | MA <sub>f</sub> -0.3 V<br>(Pt&Pd)<br>(A/mg) | MA <sub>f</sub> 0.5 V<br>(Pt&Pd)<br>(A/mg) | MA <sub>f</sub> Maximum<br>(Pt&Pd)<br>(A/mg) | Electrolyte                                           | Reference                                               |
|----------------------------------------------------------|---------------------------------------------|--------------------------------------------|----------------------------------------------|-------------------------------------------------------|---------------------------------------------------------|
| Pd                                                       | 0.47 <sup>a</sup>                           | 0.48                                       | 0.6                                          |                                                       | This work                                               |
| PdPt                                                     | 0.96 <sup>a</sup>                           | 0.40                                       | 1.0                                          |                                                       |                                                         |
| PdRuPt                                                   | 0.95 <sup>a</sup>                           | 0.58                                       | 0.9                                          |                                                       |                                                         |
| Pd <sub>3</sub> Pt half-shells                           |                                             |                                            | 0.318                                        |                                                       | Small 2018, 14, 1703940                                 |
| Pd <sub>3</sub> Pt nanocages                             |                                             |                                            | 0.220                                        |                                                       |                                                         |
| Pd black                                                 |                                             |                                            | 0.168                                        |                                                       |                                                         |
| PdPt NP/ILP-CNT                                          |                                             |                                            | 0.358                                        |                                                       | Ionics 2015, 21, 729-736                                |
| PdPt NP/CNT                                              |                                             |                                            | 0.197                                        |                                                       | Electrochimica Acta 2006, 51, 3477-3483                 |
| E-TEK PdPt/C                                             | N/A                                         | N/A                                        | 0.100                                        |                                                       |                                                         |
| PtAgCu@PtCu                                              |                                             |                                            | 0.314                                        | 0.5 M H <sub>2</sub> SO <sub>4</sub> +0.5 M HCOOH     |                                                         |
| PtCu nanoflowers                                         |                                             |                                            | 0.241                                        |                                                       | Nano Energy 2015, 12, 824– 832                          |
| Pd nanochain                                             |                                             |                                            | 0.309                                        |                                                       | Advanced Functional Materials 2017, 27                  |
| Porous PtAg@Pt                                           |                                             |                                            | 0.282                                        |                                                       | ACS applied materials & interfaces 2016, 8, 31076-31082 |
| Pt <sub>3</sub> Zn/C-300                                 | 0.0382 <sup>b</sup>                         | 0.265                                      |                                              |                                                       | J. Mater. Chem. A, 2015, 3, 22129                       |
| PtZn/C-300                                               | 0.0362 <sup>b</sup>                         | 0.249                                      |                                              |                                                       |                                                         |
| Pt <sub>3</sub> Zn/C-700                                 | 0.0276 <sup>b</sup>                         | 0.211                                      |                                              |                                                       |                                                         |
| PtZn/C-700                                               | 0.222 <sup>b</sup>                          | 0.231                                      |                                              |                                                       |                                                         |
| Pt <sub>3</sub> Zn10/C-700                               | 0.0394 <sup>b</sup>                         | 0.332                                      |                                              |                                                       |                                                         |
| Pd                                                       | 0.35 <sup>b</sup>                           |                                            |                                              | 0.1M HClO <sub>4</sub> +0.5M HCOOH                    | Nano Lett. 2017, 17, 2727–2731                          |
| Pd nanosheets                                            | 0.3 <sup>b</sup>                            |                                            | N/A                                          | 0.5 M H <sub>2</sub> SO <sub>4</sub> and 0.25 M HCOOH | Chem. Mater. 2018, 30, 3308                             |
| Pd@Au                                                    | 0.52 <sup>b</sup>                           | N/A                                        |                                              | 0.1M HClO <sub>4</sub> +3M HCOOH                      | Electrochem. Commun. 2007, 9, 1725–1729                 |
| PdNi                                                     | 0.22 <sup>b</sup>                           |                                            |                                              |                                                       |                                                         |
| PdCu                                                     | 0.38 <sup>b</sup>                           |                                            |                                              | 0.5 M H <sub>2</sub> SO <sub>4</sub> and 0.5 M HCOOH  | Appl. Catal. B 2016, 180, 758–765                       |
| Pd <sub>0.57</sub> Ni <sub>0.13</sub> Cu <sub>0.30</sub> | 0.48 <sup>b</sup>                           |                                            |                                              |                                                       |                                                         |

|                                                      |                   |                                                   |                                                 |
|------------------------------------------------------|-------------------|---------------------------------------------------|-------------------------------------------------|
| Pd <sub>57</sub> Ni <sub>43</sub><br>nanowires       | 0.62 <sup>b</sup> |                                                   | ACS Appl. Mater. Interfaces 2011, 3,<br>105–109 |
| Pd@Ni <sub>1.6</sub> B <sub>0.02</sub>               | 0.21 <sup>b</sup> |                                                   | Int. J. Hydrogen Energy 2018, 43, 3216–<br>3222 |
| 8 nm Pd <sub>0.5</sub> Co <sub>0.5</sub>             | 0.18 <sup>b</sup> | 0.1 M HClO <sub>4</sub> and 2 M HCOOH             | Nano Lett. 2012, 12, 1102–1106                  |
| PdCu alloy<br>multipod                               | 0.15 <sup>b</sup> | 0.1 M HClO <sub>4</sub> and 1M HCOOH              | n. J. Mater. Chem. A 2017, 5, 4421–4429         |
| AuPd NPs                                             | 0.42              | 0.1M HClO <sub>4</sub> +0.5M HCOOH                | Angew. Chem. Int. Ed., 2011, 50, 8876 –<br>8880 |
| Pd/CeO <sub>2</sub> NTs                              | 0.485             |                                                   | Electrocatalysis. 2015, 6, 255-262              |
| NiPd NWs/RGO                                         | 0.604             |                                                   | J. Mater. Chem. A. 2015, 3, 14001–14006         |
| AgPd NPs                                             | 0.287             |                                                   | Sci. Rep. 2015, 5, 3703                         |
| CuPd/CNTs                                            | 0.56              |                                                   | Electrochem. Commun. 2016, 69, 55–58            |
| Pd <sub>6</sub> Co<br>nanocrystals on<br>3D graphene | 0.43              | 0.5 M H <sub>2</sub> SO <sub>4</sub> +0.5 M HCOOH | Nanoscale. 2016, 8, 1905– 1909                  |
| Core/shell Au/Pd<br>NPs                              | 0.48              |                                                   | RSC Adv. 2016, 6, 24645– 24650                  |

<sup>a</sup> Mass activities (MA) at 0.3 V and 0.5 V versus the normal hydrogen electrode (NHE).

<sup>b</sup> Mass activities (MA) at 0.3 V versus the reversible hydrogen electrode (RHE)
